# Supplementary material
Source: publisher site journal article supplement (https://www.dovepress.com/article/432829)
Supplement: Supplementary file 1 [file get_supplementary_file.php]

## SUPPLEMENTARY

### Table S1 Anesthesia Protocol

Anesthesia was induced with a standardized regimen of propofol, sufentanil, and rocuronium. The anesthesia maintenance drugs included: propofol, remifentanil, rocuronium, and sevoflurane. The entropy index was maintained between 40 and 60 during surgery. Patients who cannot be monitored for depth of anesthesia by entropy index due to the location of the surgical incision will be monitored by maintaining systolic blood pressure values at baseline values  $-20\% \sim +20\%$ . After surgery, all patients were transferred to the intensive care unit with tracheal intubation for observation, and the intensive care unit physicians decided to extubate and transfer them back to the wards based on their condition.

**Table S2 Perioperative Sleep Patterns Associated with Postoperative Delirium Based on Main Effect**

|                                        | No postoperative delirium |             |             |             |             |             | Postoperative delirium |             |             |             |             |             | Time effect | Group effect |
|----------------------------------------|---------------------------|-------------|-------------|-------------|-------------|-------------|------------------------|-------------|-------------|-------------|-------------|-------------|-------------|--------------|
|                                        | Day (-3)                  | Day (-2)    | Day (-1)    | Day (1)     | Day (2)     | Day (3)     | Day (-3)               | Day (-2)    | Day (-1)    | Day (1)     | Day (2)     | Day (3)     | <i>P</i>    | <i>P</i>     |
| N                                      | 62                        | 57          | 58          | 63          | 60          | 58          | 20                     | 19          | 22          | 20          | 21          | 20          |             |              |
| Total sleep duration, min              |                           |             |             |             |             |             |                        |             |             |             |             |             | 0.014       | 0.353        |
| Mean                                   | 403.9                     | 400.3       | 397.4       | 413.3       | 396.7       | 397.0       | 405.8                  | 380.7       | 388.0       | 398.6       | 390.7       | 388.6       |             |              |
| 95% CI                                 | 396.0-411.7               | 390.0-410.7 | 387.0-407.8 | 401.8-424.9 | 387.7-405.6 | 387.3-406.7 | 388.3-423.3            | 357.5-404.0 | 370.0-405.9 | 366.9-430.3 | 369.1-412.3 | 367.0-410.1 |             |              |
| Deep sleep duration, min               |                           |             |             |             |             |             |                        |             |             |             |             |             | <0.001      | 0.126        |
| Mean                                   | 69.4                      | 64.3        | 66.6        | 65.4        | 69.1        | 77.2        | 59.9                   | 57.7        | 54.0        | 60.0        | 64.5        | 67.3        |             |              |
| 95% CI                                 | 62.8-76.0                 | 57.9-70.8   | 58.3-74.8   | 59.6-71.1   | 63.0-75.1   | 70.8-83.5   | 47.3-72.4              | 44.4-71.0   | 44.7-63.3   | 49.4-70.5   | 53.7-75.4   | 53.0-81.6   |             |              |
| Light sleep duration, min              |                           |             |             |             |             |             |                        |             |             |             |             |             | <0.001      | 0.841        |
| Mean                                   | 242.8                     | 242.1       | 244.2       | 256.3       | 236.2       | 229.8       | 258.0                  | 238.1       | 250.2       | 252.6       | 230.0       | 230.0       |             |              |
| 95% CI                                 | 236.0-249.5               | 235.2-248.9 | 237.0-251.4 | 249.7-262.9 | 227.8-244.6 | 223.4-236.3 | 240.3-275.6            | 220.6-255.5 | 236.3-264.0 | 232.8-272.3 | 213.9-246.2 | 215.3-244.7 |             |              |
| Rapid eye movement phase duration, min |                           |             |             |             |             |             |                        |             |             |             |             |             | 0.545       | 0.415        |
| Mean                                   | 91.0                      | 94.9        | 89.8        | 91.8        | 90.1        | 89.5        | 87.9                   | 85.7        | 83.7        | 88.4        | 92.5        | 92.3        |             |              |
| 95% CI                                 | 86.7-95.2                 | 90.0-99.8   | 85.1-94.4   | 86.7-97.0   | 84.9-95.3   | 84.6-94.4   | 79.6-96.2              | 76.5-95.0   | 76.6-90.7   | 77.4-99.3   | 84.4-100.6  | 81.3-103.3  |             |              |
| Sleep efficiency, %                    |                           |             |             |             |             |             |                        |             |             |             |             |             | 0.166       | 0.114        |
| Mean                                   | 82.7                      | 82.0        | 80.8        | 81.0        | 81.8        | 81.9        | 80.7                   | 79.7        | 80.4        | 80.2        | 78.1        | 80.6        |             |              |
| 95% CI                                 | 81.9-83.6                 | 80.8-83.1   | 79.6-82.0   | 79.7-82.4   | 80.7-82.8   | 80.8-83.1   | 77.9-83.5              | 76.9-82.5   | 78.5-82.2   | 77.6-82.8   | 75.2-81.0   | 78.3-82.8   |             |              |
| Sleep latency, min                     |                           |             |             |             |             |             |                        |             |             |             |             |             | 0.017       | 0.018        |

|                         |         |         |         |         |         |         |          |         |         |         |         |         |        |       |
|-------------------------|---------|---------|---------|---------|---------|---------|----------|---------|---------|---------|---------|---------|--------|-------|
| Mean                    | 27.5    | 24.9    | 28.7    | 23.7    | 22.3    | 22.9    | 33.4     | 35.3    | 37.7    | 36.1    | 30.7    | 29.7    |        |       |
| 95% CI                  | 23.5-   | 21.2-   | 24.6-   | 20.5-   | 19.2-   | 19.4-   | 24.4-    | 25.6-   | 27.5-   | 27.5-   | 23.4-   | 21.2-   |        |       |
|                         | 31.6    | 28.6    | 32.7    | 27.0    | 25.5    | 26.5    | 42.4     | 44.9    | 47.9    | 44.6    | 37.9    | 38.1    |        |       |
| Apnea-hypopnea index    |         |         |         |         |         |         |          |         |         |         |         |         | <0.001 | 0.013 |
| Mean                    | 13.5    | 12.7    | 12.8    | 24.6    | 16.9    | 14.8    | 12.6     | 15.3    | 17.1    | 27.1    | 20.8    | 19.5    |        |       |
| 95% CI                  | 12.0-   | 10.9-   | 11.0-   | 22.4-   | 14.7-   | 13.0-   | 9.9-15.2 | 12.5-   | 14.8-   | 22.0-   | 17.2-   | 16.5-   |        |       |
|                         | 15.0    | 14.4    | 14.7    | 26.8    | 19.1    | 16.7    |          | 18.1    | 19.4    | 32.1    | 24.3    | 22.4    |        |       |
| Frequency of awakenings |         |         |         |         |         |         |          |         |         |         |         |         | <0.001 | 0.020 |
| Mean                    | 4.4     | 3.7     | 5.1     | 4.7     | 4.2     | 3.2     | 4.7      | 4.4     | 6.5     | 4.9     | 4.4     | 4.9     |        |       |
| 95% CI                  | 4.0-4.8 | 3.2-4.2 | 4.5-5.7 | 4.1-5.2 | 3.6-4.7 | 2.7-3.7 | 3.8-5.6  | 3.6-5.3 | 5.7-7.4 | 4.1-5.6 | 3.7-5.0 | 4.0-5.8 |        |       |

**Notes:** Data are presented as estimated mean (95% CI). These analyses were performed using generalized estimating equations.

**Table S3 Perioperative Sleep Patterns Associated with Postoperative Delirium Based on Group-by-Time Interaction**

|                                        | No postoperative delirium | Postoperative delirium | Mean difference (%) | 95% CI        | <i>P</i> |
|----------------------------------------|---------------------------|------------------------|---------------------|---------------|----------|
| Sleep latency, mean (95% CI)           |                           |                        |                     |               |          |
| Day (-3)                               | 27.5 (23.5–31.6)          | 33.4 (24.4–42.4)       | -5.9 (17.7)         | (-15.8-4.0)   | 0.245    |
| Day (-2)                               | 24.9 (21.2–28.6)          | 35.3 (25.6–44.9)       | -10.4 (29.5)        | (-20.7–0)     | 0.050    |
| Day (-1)                               | 28.7 (24.6–32.7)          | 37.7 (27.5–47.9)       | -9.0 (23.9)         | (-19.9–2.0)   | 0.108    |
| Day (1)                                | 23.7 (20.5–27.0)          | 36.1 (27.5–44.6)       | -12.3 (34.1)        | (-21.4– -3.2) | 0.008    |
| Day (2)                                | 22.3 (19.2–25.5)          | 30.7 (23.4–37.9)       | -8.4 (27.4)         | (-16.3– -0.4) | 0.038    |
| Day (3)                                | 22.9 (19.4–26.5)          | 29.7 (21.2–38.1)       | -6.7 (22.6)         | (-15.9–2.4)   | 0.150    |
| Deep sleep duration, mean (95% CI)     |                           |                        |                     |               |          |
| Day (-3)                               | 69.4 (62.8–76.0)          | 59.9 (47.3–72.4)       | 9.5 (15.9)          | (-4.7–23.7)   | 0.189    |
| Day (-2)                               | 64.3 (57.9–70.8)          | 57.7 (44.4–71.0)       | 6.6 (11.4)          | (-8.1–21.4)   | 0.378    |
| Day (-1)                               | 66.6 (58.3–74.8)          | 54.0 (44.7–63.3)       | 12.6 (23.3)         | (0.1–25.0)    | 0.047    |
| Day (1)                                | 65.4 (59.6–71.1)          | 60.0 (49.4–70.5)       | 5.4 (9.0)           | (-6.6–17.4)   | 0.376    |
| Day (2)                                | 69.1 (63.0–75.1)          | 64.5 (53.7–75.4)       | 4.5 (7.0)           | (-7.9–16.9)   | 0.473    |
| Day (3)                                | 77.2 (70.8–83.5)          | 67.3 (53.0–81.6)       | 9.8 (14.6)          | (-5.8–25.5)   | 0.216    |
| Frequency of awakenings, mean (95% CI) |                           |                        |                     |               |          |
| Day (-3)                               | 4.4 (4.0–4.8)             | 4.7 (3.8–5.6)          | -0.3 (6.4)          | (-1.3–0.7)    | 0.585    |
| Day (-2)                               | 3.7 (3.2–4.2)             | 4.4 (3.6–5.3)          | -0.7 (15.9)         | (-1.7–0.3)    | 0.162    |
| Day (-1)                               | 5.1 (4.5–5.7)             | 6.5 (5.7–7.4)          | -1.4 (21.5)         | (-2.4– -0.4)  | 0.006    |
| Day (1)                                | 4.7 (4.1–5.2)             | 4.9 (4.1–5.6)          | -0.2 (4.1)          | (-1.2–0.8)    | 0.711    |
| Day (2)                                | 4.2 (3.6–4.7)             | 4.4 (3.7–5.0)          | -0.2 (4.5)          | (-1.1–0.6)    | 0.593    |
| Day (3)                                | 3.2 (2.7–3.7)             | 4.9 (4.0–5.8)          | -1.7 (34.7)         | (-2.7– -0.7)  | 0.001    |
| Apnea-hypopnea index, mean (95% CI)    |                           |                        |                     |               |          |
| Day (-3)                               | 13.5 (12.0–15.0)          | 12.6 (9.9–15.2)        | 1.0 (7.9)           | (-2.1–4.1)    | 0.533    |
| Day (-2)                               | 12.7 (10.9–14.4)          | 15.3 (12.5–18.1)       | -2.6 (17.0)         | (-5.9–0.7)    | 0.126    |

|                                                  |          |                     |                     |             |               |       |
|--------------------------------------------------|----------|---------------------|---------------------|-------------|---------------|-------|
|                                                  | Day (-1) | 12.8 (11.0–14.7)    | 17.1 (14.8–19.4)    | -4.2 (24.6) | (-7.2– -1.3)  | 0.005 |
|                                                  | Day (1)  | 24.6 (22.4–26.8)    | 27.1 (22.0–32.1)    | -2.4 (8.9)  | (-8.0–3.1)    | 0.388 |
|                                                  | Day (2)  | 16.9 (14.7–19.1)    | 20.8 (17.2–24.3)    | -3.9 (18.8) | (-8.1–0.3)    | 0.071 |
|                                                  | Day (3)  | 14.8 (13.0–16.7)    | 19.5 (16.5–22.4)    | -4.6 (23.6) | (-8.1– -1.1)  | 0.010 |
| Sleep efficiency, mean (95% CI)                  |          |                     |                     |             |               |       |
|                                                  | Day (-3) | 82.7 (81.9–83.6)    | 80.7 (77.9–83.5)    | 2.0 (2.5)   | (-0.9–5.0)    | 0.179 |
|                                                  | Day (-2) | 82.0 (80.8–83.1)    | 79.7 (76.9–82.5)    | 2.3 (2.9)   | (-0.8–5.3)    | 0.143 |
|                                                  | Day (-1) | 80.8 (79.6–82.0)    | 80.4 (78.5–82.2)    | 0.4 (0.5)   | (-1.8–2.7)    | 0.706 |
|                                                  | Day (1)  | 81.0 (79.7–82.4)    | 80.2 (77.6–82.8)    | 0.8 (1.0)   | (-2.1–3.7)    | 0.574 |
|                                                  | Day (2)  | 81.8 (80.7–82.8)    | 78.1 (75.2–81.0)    | 3.7 (4.7)   | (0.6–6.8)     | 0.021 |
|                                                  | Day (3)  | 81.9 (80.8–83.1)    | 80.6 (78.3–82.8)    | 1.4 (1.7)   | (-1.2–4.0)    | 0.286 |
| Total sleep duration, mean (95% CI)              |          |                     |                     |             |               |       |
|                                                  | Day (-3) | 403.9 (396.0–411.7) | 405.8 (388.3–423.3) | -1.9 (0.5)  | (-21.1–17.2)  | 0.842 |
|                                                  | Day (-2) | 400.3 (390.0–410.7) | 380.7 (357.5–404.0) | 19.6 (5.1)  | (-5.9–45.1)   | 0.132 |
|                                                  | Day (-1) | 397.4 (387.0–407.8) | 388.0 (370.0–405.9) | 9.4 (2.4)   | (-11.3–30.2)  | 0.373 |
|                                                  | Day (1)  | 413.3 (401.8–424.9) | 398.6 (366.9–430.3) | 14.7 (3.7)  | (-19.0– 48.5) | 0.392 |
|                                                  | Day (2)  | 396.7 (387.7–405.6) | 390.7 (369.1–412.3) | 5.9 (1.5)   | (-17.5– 29.3) | 0.619 |
|                                                  | Day (3)  | 397.0 (387.3–406.7) | 388.6 (367.0–410.1) | 8.4 (2.2)   | (-15.2–32.0)  | 0.483 |
| Light sleep duration, mean (95% CI)              |          |                     |                     |             |               |       |
|                                                  | Day (-3) | 242.8 (236.0–249.5) | 258.0 (240.3–275.6) | -15.2 (5.9) | (-34.1–3.7)   | 0.115 |
|                                                  | Day (-2) | 242.1 (235.2–248.9) | 238.1 (220.6–255.5) | 4.0 (1.7)   | (-14.7–22.7)  | 0.675 |
|                                                  | Day (-1) | 244.2 (237.0–251.4) | 250.2 (236.3–264.0) | -6.0 (2.4)  | (-21.6–9.6)   | 0.453 |
|                                                  | Day (1)  | 256.3 (249.7–262.9) | 252.6 (232.8–272.3) | 3.8 (1.5)   | (-17.0–24.6)  | 0.723 |
|                                                  | Day (2)  | 236.2 (227.8–244.6) | 230.0 (213.9–246.2) | 6.2 (2.7)   | (-12.1–24.4)  | 0.508 |
|                                                  | Day (3)  | 229.8 (223.4–236.3) | 230.0 (215.3–244.7) | -0.2 (0.1)  | (-16.2–15.9)  | 0.983 |
| Rapid eye movement phase duration, mean (95% CI) |          |                     |                     |             |               |       |

|          |                  |                   |            |             |       |
|----------|------------------|-------------------|------------|-------------|-------|
| Day (-3) | 91.0 (86.7–95.2) | 87.9 (79.6–96.2)  | 3.1 (3.5)  | (-6.2–12.4) | 0.517 |
| Day (-2) | 94.9 (90.0–99.8) | 85.7 (76.5–95.0)  | 9.2 (10.7) | (-1.3–19.6) | 0.085 |
| Day (-1) | 89.8 (85.1–94.4) | 83.7 (76.6–90.7)  | 6.1 (7.3)  | (-2.4–14.5) | 0.159 |
| Day (1)  | 91.8 (86.7–97.0) | 88.4 (77.4–99.3)  | 3.5 (4.0)  | (-8.6–15.6) | 0.571 |
| Day (2)  | 90.1 (84.9–95.3) | 92.5 (84.4–100.6) | -2.4 (2.6) | (-12.1–7.2) | 0.619 |
| Day (3)  | 89.5 (84.6–94.4) | 92.3 (81.3–103.3) | -2.8 (3.0) | (-14.8–9.2) | 0.649 |

**Notes:** Data are presented as estimated mean (95% CI). These analyses were performed using generalized estimating equations.

(A)

Total sleep duration

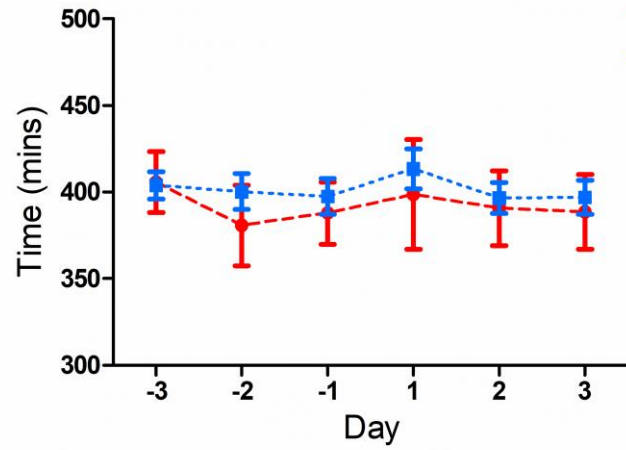

(B)

Light sleep duration

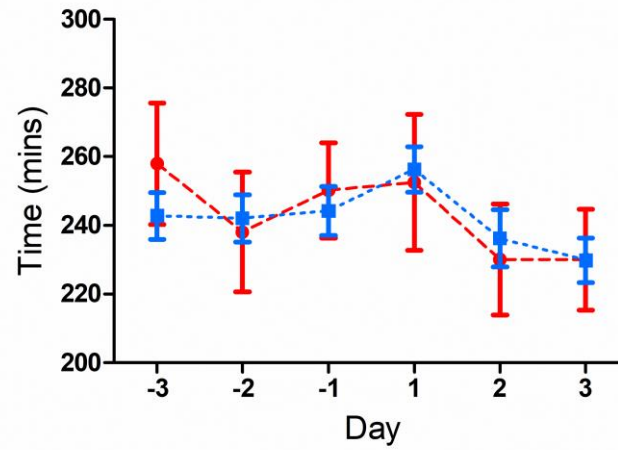

(C)

Rapid eye movement phase duration

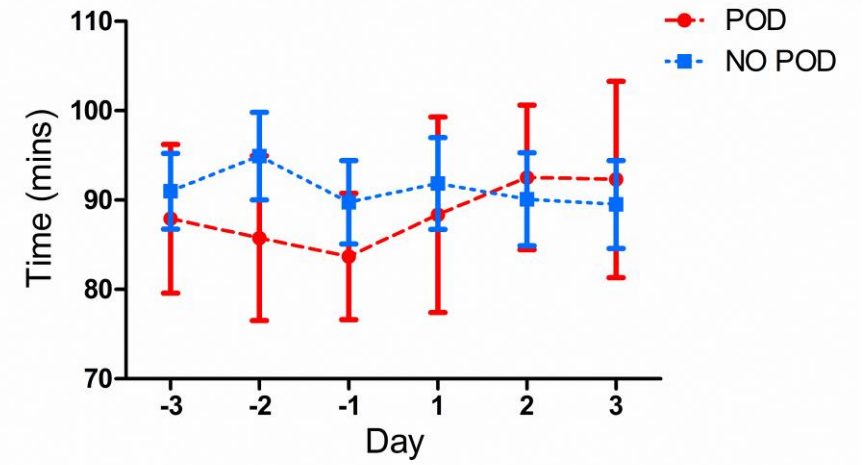

**Figure S1** Parameters of perioperative sleep patterns in patients with and without POD (A: Total sleep duration; B: Light sleep duration; C: Rapid eye movement phase duration).

**Notes:** These analyses were performed using analysis of generalized estimating equations(\* $P < 0.05$ ). Patients with POD: n=22; Patients without POD: n=65.

Estimated mean and 95% CI are plotted for each group for each day.

**Abbreviations:** POD: Postoperative delirium.



## Barthel Index Scoring Form

Patient Name: \_\_\_\_\_ Rater Name: \_\_\_\_\_ Date: \_\_\_\_\_

### FEEDING

0 = unable  
5 = needs help cutting, spreading butter, etc., or requires modified diet  
10 = independent

### BATHING

0 = dependent  
5 = independent (or in shower)

### GROOMING

0 = needs to help with personal care  
5 = independent face/hair/teeth/shaving (implements provided)

### DRESSING

0 = dependent  
5 = needs help but can do about half unaided  
10 = independent (including buttons, zips, laces, etc.)

### BOWELS

0 = incontinent (or needs to be given enemas)  
5 = occasional accident  
10 = continent

### BLADDER

0 = incontinent, or catheterized and unable to manage alone  
5 = occasional accident  
10 = continent

### TOILET USE

0 = dependent  
5 = needs some help, but can do something alone  
10 = independent (on and off, dressing, wiping)

### TRANSFERS (BED TO CHAIR AND BACK)

0 = unable, no sitting balance  
5 = major help (one or two people, physical), can sit  
10 = minor help (verbal or physical)  
15 = independent

### MOBILITY (ON LEVEL SURFACES)

0 = immobile or < 50 yards  
5 = wheelchair independent, including corners, > 50 yards  
10 = walks with help of one person (verbal or physical) > 50 yards  
15 = independent (but may use any aid; for example, stick) > 50 yards

### STAIRS

0 = unable  
5 = needs help (verbal, physical, carrying aid)  
10 = independent

**TOTAL SCORE=** \_\_\_\_\_

---

### The Barthel ADL Index: Guidelines

1. The index should be used as a record of what a patient does, not as a record of what a patient could do.
2. The main aim is to establish degree of independence from any help, physical or verbal, however minor and for whatever reason.
3. The need for supervision renders the patient not independent.
4. A patient's performance should be established using the best available evidence. Asking the patient, friends/relatives and nurses are the usual sources, but direct observation and common sense are also important. However direct testing is not needed.
5. Usually the patient's performance over the preceding 24-48 hours is important, but occasionally longer periods will be relevant.
6. Middle categories imply that the patient supplies over 50 per cent of the effort.
7. Use of aids to be independent is allowed.

---

### References

Mahoney FI, Barthel D. "Functional evaluation: the Barthel Index." *Maryland State Medical Journal* 1965;14:56-61. Used with permission.

Loewen SC, Anderson BA. "Predictors of stroke outcome using objective measurement scales." [Stroke.1990;21:78-81.](#)

Gresham GE, Phillips TF, Labi ML. "ADL status in stroke: relative merits of three standard indexes." [Arch Phys Med Rehabil.1980;61:355-358.](#)

Collin C, Wade DT, Davies S, Horne V. "The Barthel ADL Index: a reliability study." [Int Disability Study.1988;10:61-63.](#)

Date created: 1/2000

Last reviewed: 8/2004

Reviewed/Approved by: L. Schwamm, M.D. / Acute Stroke Team

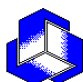

## EORTC QLQ-C30 (version 3)

We are interested in some things about you and your health. Please answer all of the questions yourself by circling the number that best applies to you. There are no "right" or "wrong" answers. The information that you provide will remain strictly confidential.

Please fill in your initials:

|  |  |  |  |  |
|--|--|--|--|--|
|  |  |  |  |  |
|--|--|--|--|--|

Your birthdate (Day, Month, Year):

|  |  |  |  |  |  |  |  |  |  |
|--|--|--|--|--|--|--|--|--|--|
|  |  |  |  |  |  |  |  |  |  |
|--|--|--|--|--|--|--|--|--|--|

Today's date (Day, Month, Year):

31 

|  |  |  |  |  |  |  |  |  |  |
|--|--|--|--|--|--|--|--|--|--|
|  |  |  |  |  |  |  |  |  |  |
|--|--|--|--|--|--|--|--|--|--|

|                                                                                                          | Not at<br>All | A<br>Little | Quite<br>a Bit | Very<br>Much |
|----------------------------------------------------------------------------------------------------------|---------------|-------------|----------------|--------------|
| 1. Do you have any trouble doing strenuous activities, like carrying a heavy shopping bag or a suitcase? | 1             | 2           | 3              | 4            |
| 2. Do you have any trouble taking a <u>long</u> walk?                                                    | 1             | 2           | 3              | 4            |
| 3. Do you have any trouble taking a <u>short</u> walk outside of the house?                              | 1             | 2           | 3              | 4            |
| 4. Do you need to stay in bed or a chair during the day?                                                 | 1             | 2           | 3              | 4            |
| 5. Do you need help with eating, dressing, washing yourself or using the toilet?                         | 1             | 2           | 3              | 4            |

### During the past week:

|                                                                                | Not at<br>All | A<br>Little | Quite<br>a Bit | Very<br>Much |
|--------------------------------------------------------------------------------|---------------|-------------|----------------|--------------|
| 6. Were you limited in doing either your work or other daily activities?       | 1             | 2           | 3              | 4            |
| 7. Were you limited in pursuing your hobbies or other leisure time activities? | 1             | 2           | 3              | 4            |
| 8. Were you short of breath?                                                   | 1             | 2           | 3              | 4            |
| 9. Have you had pain?                                                          | 1             | 2           | 3              | 4            |
| 10. Did you need to rest?                                                      | 1             | 2           | 3              | 4            |
| 11. Have you had trouble sleeping?                                             | 1             | 2           | 3              | 4            |
| 12. Have you felt weak?                                                        | 1             | 2           | 3              | 4            |
| 13. Have you lacked appetite?                                                  | 1             | 2           | 3              | 4            |
| 14. Have you felt nauseated?                                                   | 1             | 2           | 3              | 4            |
| 15. Have you vomited?                                                          | 1             | 2           | 3              | 4            |
| 16. Have you been constipated?                                                 | 1             | 2           | 3              | 4            |

Please go on to the next page

**During the past week:**

|  | Not at<br>All | A<br>Little | Quite<br>a Bit | Very<br>Much |
|--|---------------|-------------|----------------|--------------|
|--|---------------|-------------|----------------|--------------|

- |                                                                                                          |   |   |   |   |
|----------------------------------------------------------------------------------------------------------|---|---|---|---|
| 17. Have you had diarrhea?                                                                               | 1 | 2 | 3 | 4 |
| 18. Were you tired?                                                                                      | 1 | 2 | 3 | 4 |
| 19. Did pain interfere with your daily activities?                                                       | 1 | 2 | 3 | 4 |
| 20. Have you had difficulty in concentrating on things, like reading a newspaper or watching television? | 1 | 2 | 3 | 4 |
| 21. Did you feel tense?                                                                                  | 1 | 2 | 3 | 4 |
| 22. Did you worry?                                                                                       | 1 | 2 | 3 | 4 |
| 23. Did you feel irritable?                                                                              | 1 | 2 | 3 | 4 |
| 24. Did you feel depressed?                                                                              | 1 | 2 | 3 | 4 |
| 25. Have you had difficulty remembering things?                                                          | 1 | 2 | 3 | 4 |
| 26. Has your physical condition or medical treatment interfered with your <u>family</u> life?            | 1 | 2 | 3 | 4 |
| 27. Has your physical condition or medical treatment interfered with your <u>social</u> activities?      | 1 | 2 | 3 | 4 |
| 28. Has your physical condition or medical treatment caused you financial difficulties?                  | 1 | 2 | 3 | 4 |

**For the following questions please circle the number between 1 and 7 that best applies to you**

29. How would you rate your overall health during the past week?

1      2      3      4      5      6      7

Very poor

Excellent

30. How would you rate your overall quality of life during the past week?

1      2      3      4      5      6      7

Very poor

Excellent
